# Supplementary material for: Ultrahigh compressibility and superior elasticity carbon framework derived from shaddock peel for high-performance pressure sensing
Source: Royal Society of Chemistry journal article supplement (doi:10.1039/d1ra02978a), 2021-01-01
Supplement: d1ra02978a1.pdf [file d1ra02978a1.pdf]

Supporting online materials for

**Ultrahigh compressibility and superior elasticity carbon framework derived from shaddock peel for high-performance pressure sensing**

**Na Zheng<sup>1, 2</sup>, Changzhou Chen<sup>1, 2\*</sup>, Mengqi Tang<sup>1, 2</sup>, Weixin Wu<sup>1, 2</sup>, Yan Jiang<sup>1, 2</sup>  
Douyong Min<sup>1,2</sup>**

### *Optimization of PDMS concentration*

PDMS and N-hexane mixed solvent with different concentration of PDMS was prepared by adding PDMS base agent (0.5 g, 1.0 g, 1.5 g and 2.0 g) and curing agent (base agent and curing agent in a mass ratio of 10:1) into 10 mL N-hexane. The detailed preparation of M-SPF samples has been described in section 2.3 and the corresponding products were named as M-SPF-0.5, M-SPF-1.0, M-SPF-1.5 and M-SPF-2.0. We found that the M-SPF-0.5 was fragile and non-elastic, which is not available for flexible sensing material. The densities of M-SPF-1.0, M-SPF-1.5 and M-SPF-2.0 were calculated to be 0.358 g/cm<sup>3</sup>, 0.571 g/cm<sup>3</sup>, 0.726 g/cm<sup>3</sup>, respectively, suggesting the thickness of PDMS layer on C-SPF increased as the concentration of PDMS increased. Due to the PDMS is a non-conductive medium, the conductivity of M-SPF will decrease with the increased amount of PDMS. The conductivities of M-SPF-1.0, M-SPF-1.5 and M-SPF-2.0 samples were tested to be 1.47 s/m, 0.61 s/m and 0.19 s/m, respectively. Thus, M-SPF-1.0 with the best conductivity was used as the pressure sensing material in this study.

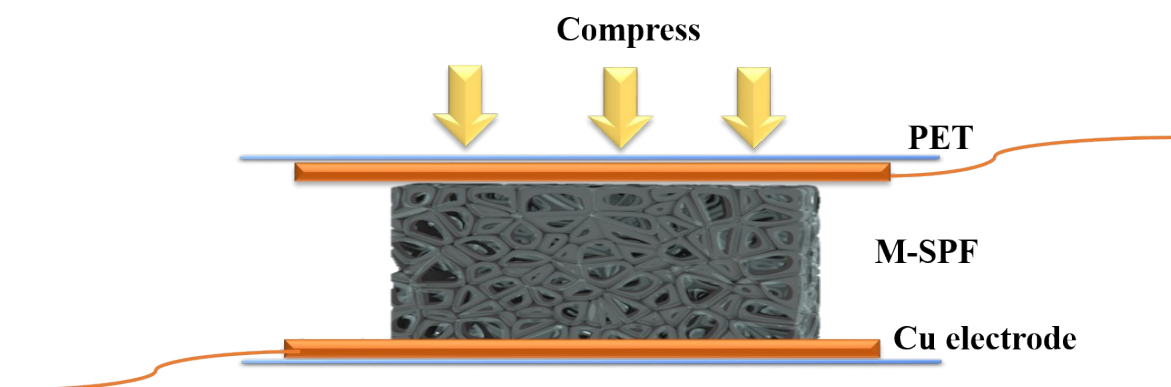

**Fig. S1.** The composition of the prepared pressure sensor.

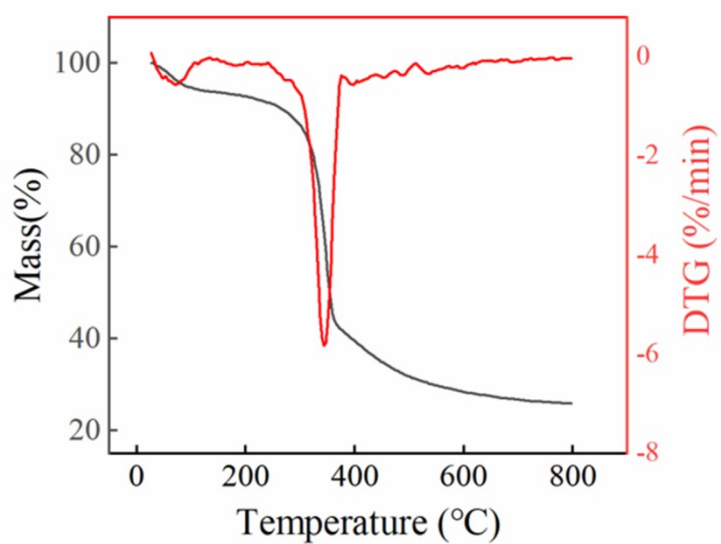

**Fig. S2.** TG-DTG curves of SPF.

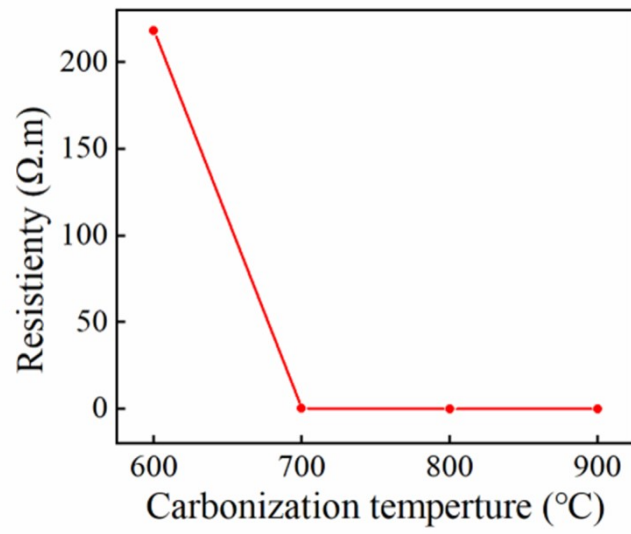

**Fig. S3.** The conductivity of C-SPFs obtained at different temperatures.

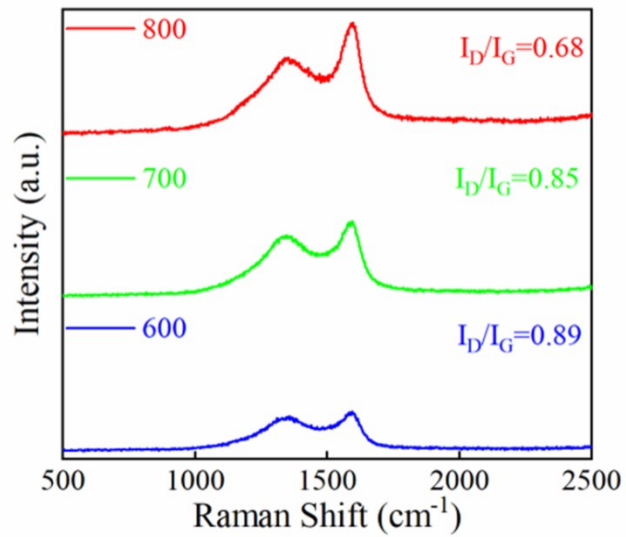

**Fig. S4.** Raman spectra of samples at different temperatures.

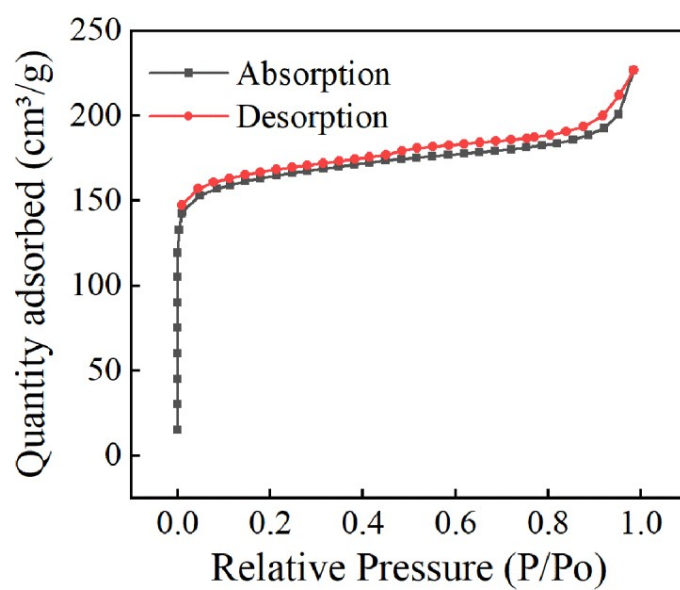

**Fig. S5.** The nitrogen adsorption and desorption isotherms of C-SPF in Brunauer-Emmett-Teller (BET) measurement.

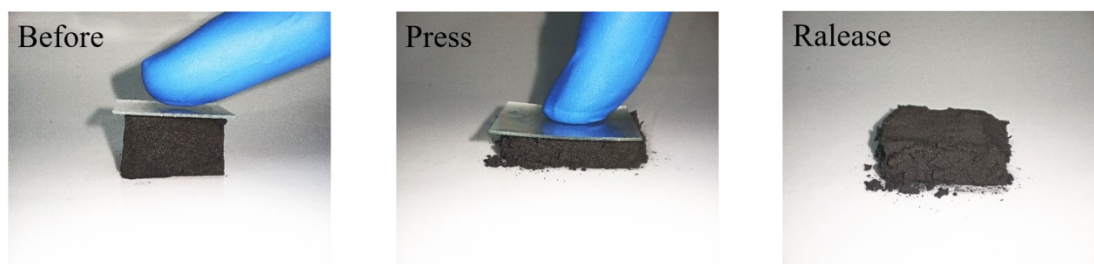

**Fig. S6.** Photos of C-SPF before and after compression.

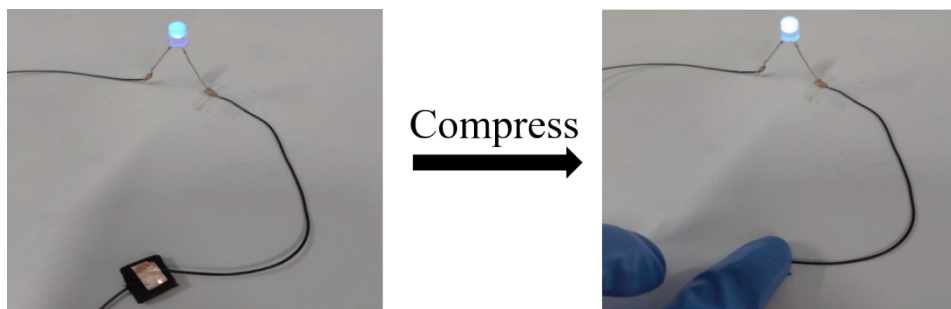

**Fig. S7.** Changes in brightness of LED lights without pressing and pressing.

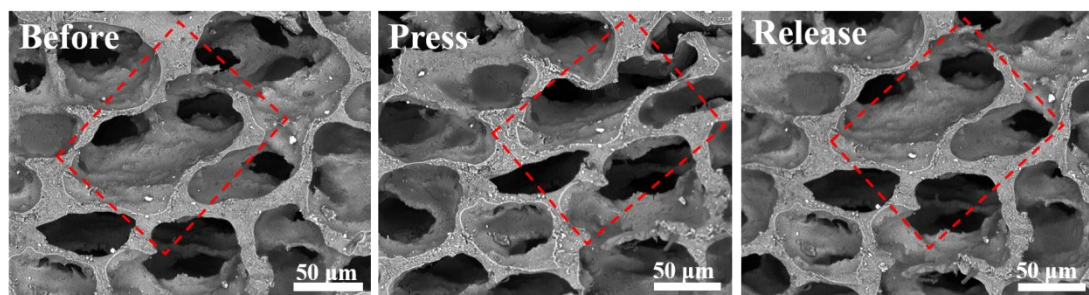

**Fig. S8.** SEM images of M-SPF in the process of compression and release.

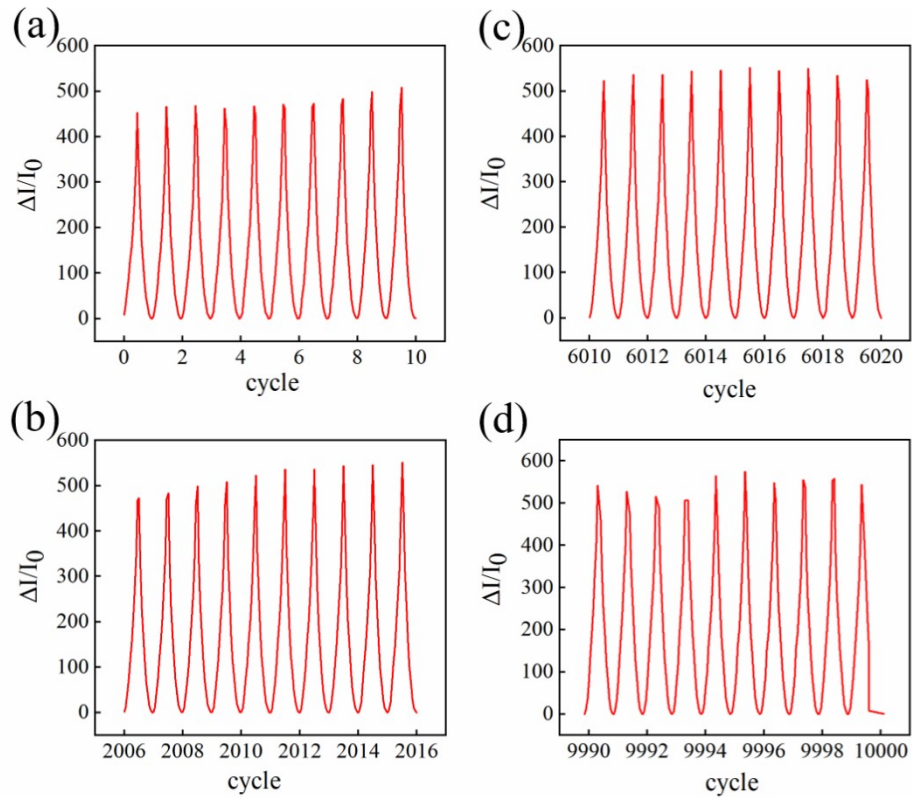

**Fig. S9.** Partial electrical response curves for 10,000 cyclic of M-SPF at 50% strain.

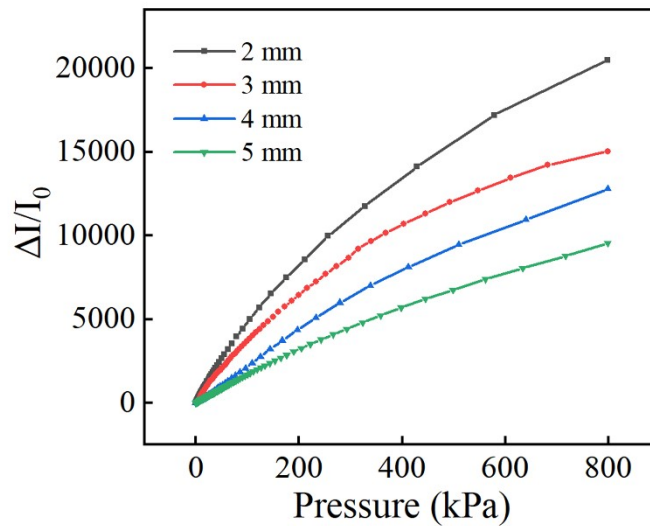

**Fig. S10.** The effect of thickness on the sensitivity of M-SPF-based sensor.

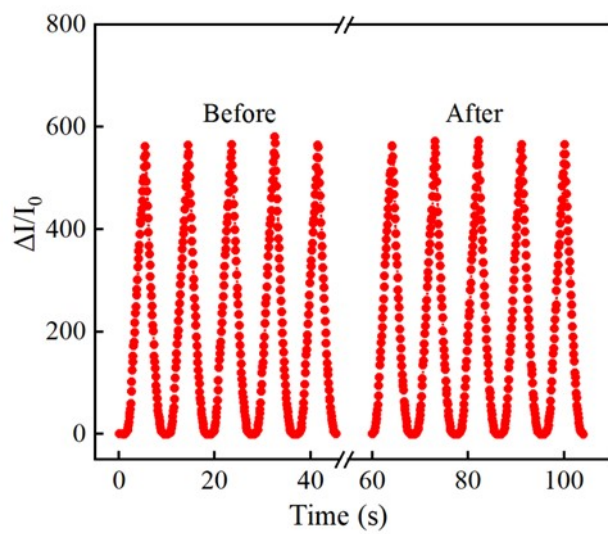

**Fig. S11.** Response of the same pressure sensor to electrical signals at 50% strain before and after three months.



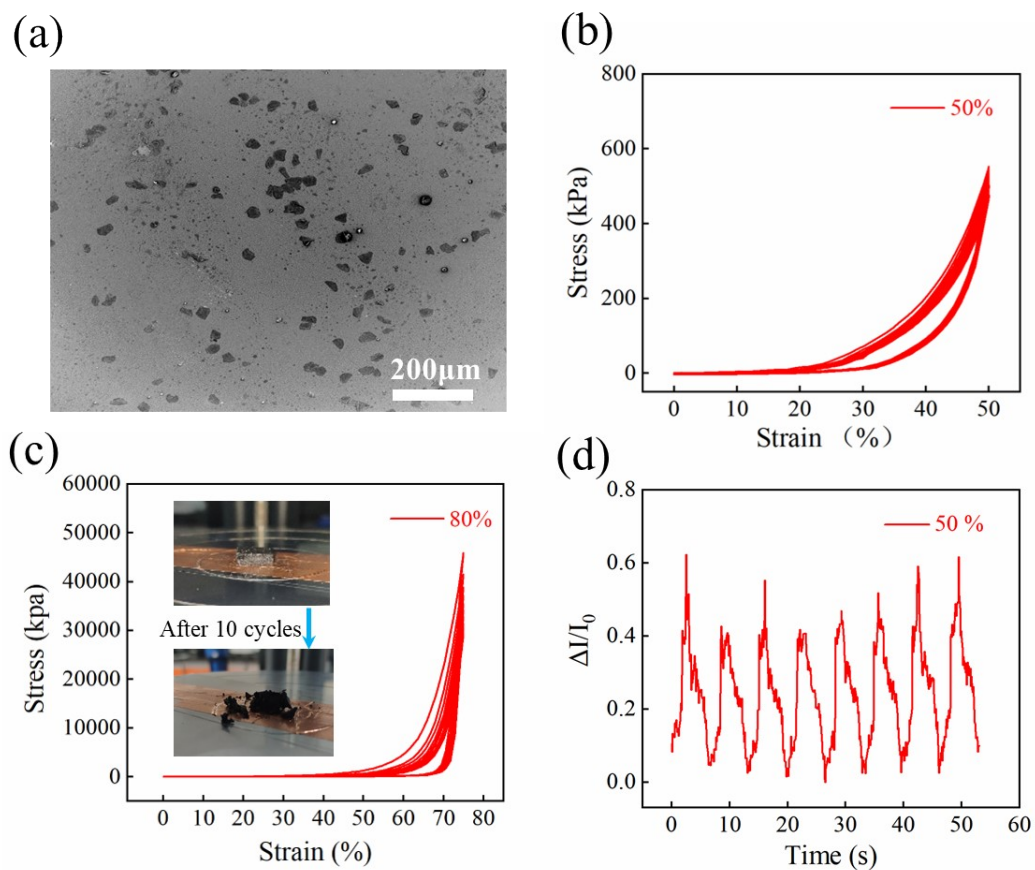

**Fig. S12.** (a) SEM image of CSPP-PDMS (b) 100 cyclic loading–unloading curves under 50% compression strain. (c) 10 cyclic loading–unloading curves under 80% compression strain. (The inset represents the appearance of CSPP-PDMS before and after compression) (d) The RCR of the CSPP-PDMS based pressure sensor under 50% strain.

**Table S1** The bulk density, porosity and the ratio of carbon and oxygen content of the samples.

| <b>Samples</b> | <b>Bulk density (g/cm<sup>3</sup>)</b> | <b>Porosity (%)</b> | <b>C/O</b> |
|----------------|----------------------------------------|---------------------|------------|
| SP             | 0.0841                                 | 89                  | 2.10       |
| SPF            | 0.0342                                 | 94                  | 2.53       |
| C-SPF          | 0.0257                                 | 93                  | 9.59       |
| M-SPF          | 0.3584                                 | 67                  | 1.76       |

**Table S2** Material properties of each component in the simulation work.

| <b>Samples</b> | <b>Bulk density (g/cm<sup>3</sup>)</b> | <b>Elastic modules(kPa)</b> | <b>Poisson ratio</b> |
|----------------|----------------------------------------|-----------------------------|----------------------|
| C-SPF          | 0.0257                                 | 0.65                        | 0.25                 |
| M-SPF          | 0.3584                                 | 21.9                        | 0.35                 |

**Table S3** Comparison of the detection range and sensitivity for various pressure sensing materials.

| <b>Materials</b>                                               | <b>Detection range and Sensitivity</b>                                                                                   | <b>Ref.</b> |
|----------------------------------------------------------------|--------------------------------------------------------------------------------------------------------------------------|-------------|
| 2D WSe <sub>2</sub> Nanosheets                                 | 1 -100 kPa (S=29.24 kPa <sup>-1</sup> )<br>0.001-0.5 kPa (S=18.42 kPa <sup>-1</sup> )                                    | 14          |
| 2D MoSe <sub>2</sub> Nanosheets                                | 1-35 kPa (S=7.28 kPa <sup>-1</sup> )<br>40-100 kPa (S=2.63 kPa <sup>-1</sup> )<br>5 kPa (S=5 kPa <sup>-1</sup> )         | 15          |
| Alginate and graphene Sponge                                   | 50 kPa (S=1 kPa <sup>-1</sup> )<br>500-1000 kPa (S=0.005 kPa <sup>-1</sup> )                                             | 17          |
| rGO and Polyaniline Sponge                                     | 0-27 kPa (S=0.152 kPa <sup>-1</sup> )                                                                                    | 19          |
| PANI Paper                                                     | 2-90 kPa (S=2.23 kPa <sup>-1</sup> )                                                                                     | 20          |
| PPy and Cotton                                                 | 0.1-5 kPa (S=4.5 kPa <sup>-1</sup> )                                                                                     | 21          |
| Graphene–Polyurethane Sponge                                   | 0-2 kPa (S=0.26 kPa <sup>-1</sup> )<br>2-10 kPa (S=0.03 kPa <sup>-1</sup> )                                              | 50          |
| GO- Hybridized CNTs Aerogels                                   | 0-1 kPa (S=1.22 kPa <sup>-1</sup> )<br>1-8 kPa (S=0.39 kPa <sup>-1</sup> )                                               | 51          |
| Silver Nano-flower Decorated<br>Graphene Oxide-Sponges         | 0-10 kPa (S=0.572 kPa <sup>-1</sup> )                                                                                    | 52          |
| Carbon Black and Polyurethane<br>Sponge                        | 0-2 kPa (S=0.068 kPa <sup>-1</sup> )<br>2-10 kPa (S=0.023 kPa <sup>-1</sup> )<br>10-16 kPa (S=0.036 kPa <sup>-1</sup> )  | 53          |
| Nano-fibrous Aerogels                                          | 0-3.5 kPa (S=0.43 kPa <sup>-1</sup> )<br>3.5-5 kPa (S=1.02 kPa <sup>-1</sup> )<br>0-0.1 kPa (S=22.05 kPa <sup>-1</sup> ) | 62          |
| CNT/rGO–CNF carbon aerogel                                     | 0.1-1 kPa (S=11.82 kPa <sup>-1</sup> )<br>1-5 kPa (S=0.44 kPa <sup>-1</sup> )                                            | 64          |
| Carbide Nano-sheets and Bacterial<br>Cellulose Carbon Aerogels | 0-10 kPa (S=12.5 kPa <sup>-1</sup> )                                                                                     | S1          |

---

|                                          |                                           |              |
|------------------------------------------|-------------------------------------------|--------------|
| Aligned carbon nanotubes/graphene        | 0-0.3 kPa ( $S=19.8 \text{ kPa}^{-1}$ )   | S2           |
|                                          | 0.3-6 kPa ( $S=0.27 \text{ kPa}^{-1}$ )   |              |
| Graphene Sponges                         | 0.3-10 kPa ( $S=0.046 \text{ kPa}^{-1}$ ) | S3           |
|                                          | 10-40 kPa ( $S=0.007 \text{ kPa}^{-1}$ )  |              |
| Graphene/Polyimide<br>Nanocomposite Foam | 0-1.5 kPa ( $S=0.18 \text{ kPa}^{-1}$ )   | S4           |
|                                          | 1.5-7 kPa ( $S=0.023 \text{ kPa}^{-1}$ )  |              |
| M-SPF                                    | 1-10 kPa ( $S=48.5 \text{ kPa}^{-1}$ )    | This<br>work |
|                                          | 10-100 kPa ( $S=63.4 \text{ kPa}^{-1}$ )  |              |
|                                          | 100-800 kPa ( $25.6 \text{ kPa}^{-1}$ )   |              |

---

## References

- S1. Z. Chen, Y. Hu, H. Zhuo, L. Liu, S. Jing, L. Zhong, X. Peng and R. C. Sun, *Chem. Mater.*, 2019, **31**, 3301-3312.
- S2. M. Jian, K. Xia, Q. Wang, Z. Yin, H. Wang, C. Wang, H. Xie, M. Zhang and Y. Zhang, *Adv. Funct. Mater.*, 2017, **27**, 1606066.
- S3. L. Zhu, Y. Wang, D. Mei and X. Wu, *J. Microelectromech. S.*, 2019, **28**, 154-163.
- S4. Y. Qin, Q. Peng, Y. Ding, Z. Lin, C. Wang, Y. Li, J. Li, Y. Yuan, X. He and Y. Li, *ACS Nano*, 2015, **9**, 8933-8941.
